# Supplementary material for: Integrated Bioinformatics Analysis of the Clinical Value and Biological Function of ATAD2 in Hepatocellular Carcinoma
Source: Hindawi journal article supplement (doi:10.1155/2020/8657468), 2020-01-01
Supplement: f1 [file 8657468.f1.zip]

**Table S1:** Univariate and multivariate analyses of individual parameters for correlations with overall survival rate: Cox proportional hazards model

| Variables       | HR    | Univariate<br><i>CI</i> (95%) | <i>P</i> | HR    | Multivariate<br><i>CI</i> (95%) | <i>P</i> |
|-----------------|-------|-------------------------------|----------|-------|---------------------------------|----------|
| ATAD2           | 6.15  | 2.842-13.308                  | <0.001   | 2.49  | 1.007-6.161                     | 0.048    |
| Age             | 1.087 | 0.601-1.967                   | 0.783    |       |                                 |          |
| Gender          | 1.627 | 0.833-3.177                   | 0.154    |       |                                 |          |
| Size            | 1.763 | 1.018-3.054                   | 0.043    |       |                                 |          |
| Metastasis      | 2.471 | 1.426-4.283                   | 0.001    | 2.315 | 1.263-4.243                     | 0.007    |
| Invasion        | 1.349 | 0.773-2.354                   | 0.292    |       |                                 |          |
| Cirrhosis       | 1.78  | 0.546-5.799                   | 0.339    |       |                                 |          |
| HBsAg           | 1.367 | 0.697-2.683                   | 0.363    |       |                                 |          |
| AFP             | 2.165 | 1.219-3.845                   | 0.008    | 2.168 | 1.006-4.412                     | 0.033    |
| TNM             | 3.233 | 1.845-5.666                   | <0.001   |       |                                 |          |
| Differentiation | 1.656 | 0.906-3.024                   | 0.101    |       |                                 |          |

Abbreviation:HR, Hazard Ratio;

**Table S2:**Comparison of diagnostic efficacy among ATAD2,GPC3 and AFP in the diagnosis of HCC in Asian race from TCGA data

| Makers | Sensitivity(%) | Specificity(%) | Coincidence rate(%) | Area    | <i>P</i> |
|--------|----------------|----------------|---------------------|---------|----------|
| ATAD2  | 83.02*         | 100            | 83.6(138/165)*      | 0.8878* | 0.0013   |
| GPC3   | 84.91*         | 100            | 85.5(141/165)*      | 0.9340* | 0.0003   |
| AFP    | 57.86          | 100            | 59.4(98/165)        | 0.6834  | 0.1224   |

Abbreviation:Compared to the AFP:\**P*<0.05

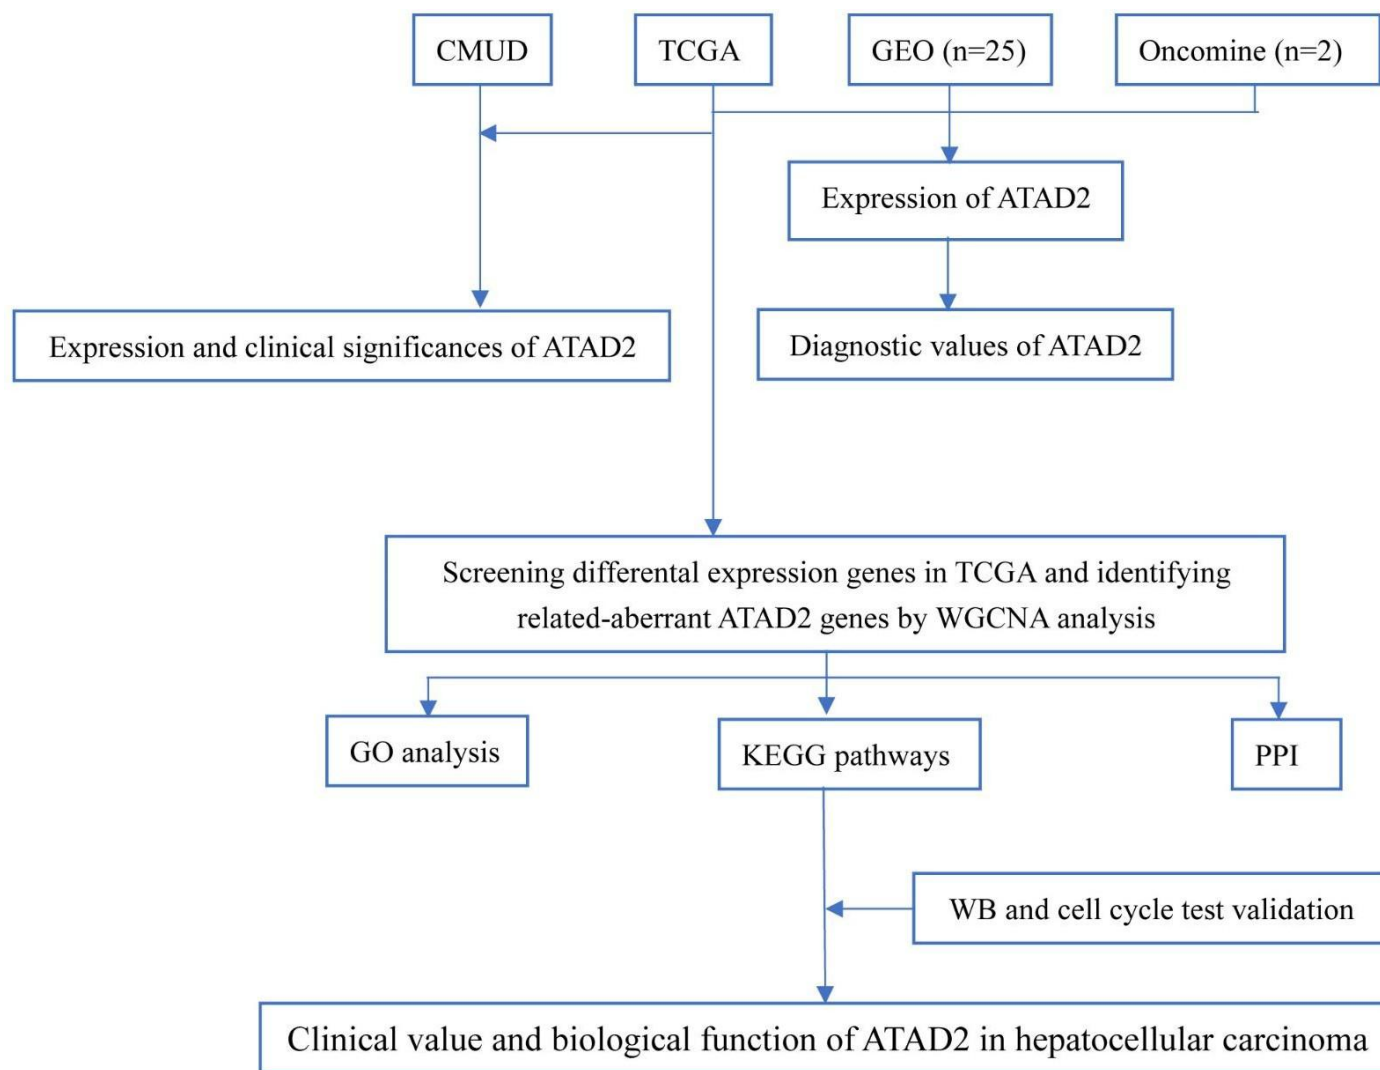

Figure S1: Flow chart of the researching content in the present study .

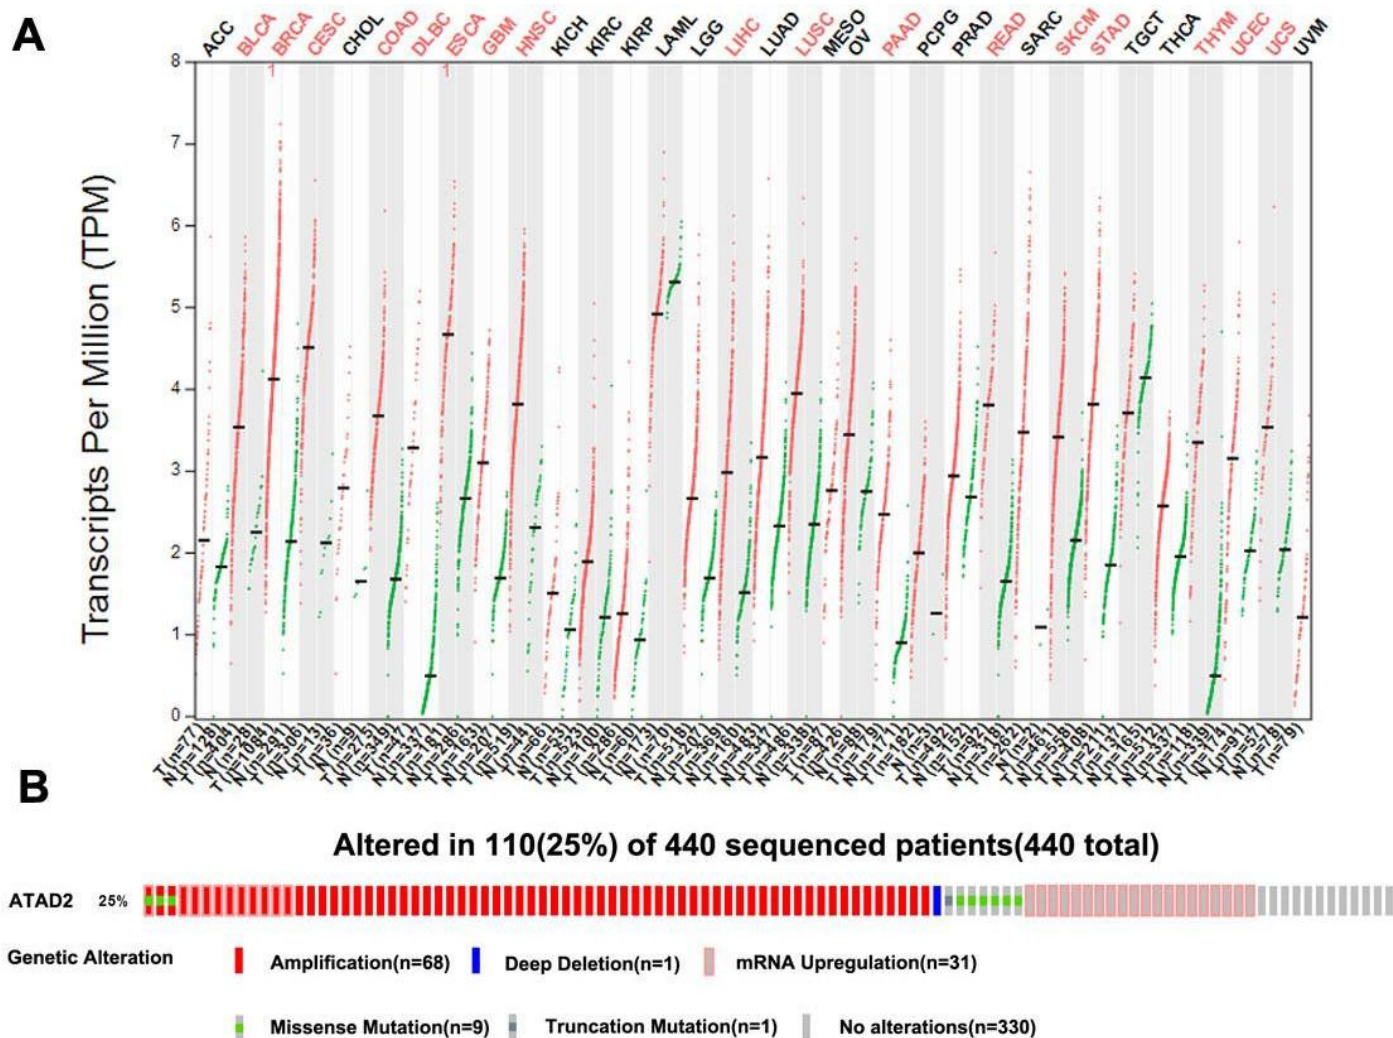

**Figure S2** ATAD2 expression pattern based on Gene Expression Profiling Interactive Analysis (GEPIA) and genetic alteration from cBioPortal. A, Transcripts Per Million (TPM) data of ATAD2 expression are presented based on GEPIA. B, Genetic alteration of ATAD2 in 440 HCC patients from cBioPortal. ATAD2 was altered in a total of 110 HCC patients. ATAD2 amplified in 68 patients and deep deleted in 1 patients. ATAD2 upregulated in 31 cases and its other alterings were 10 cases.

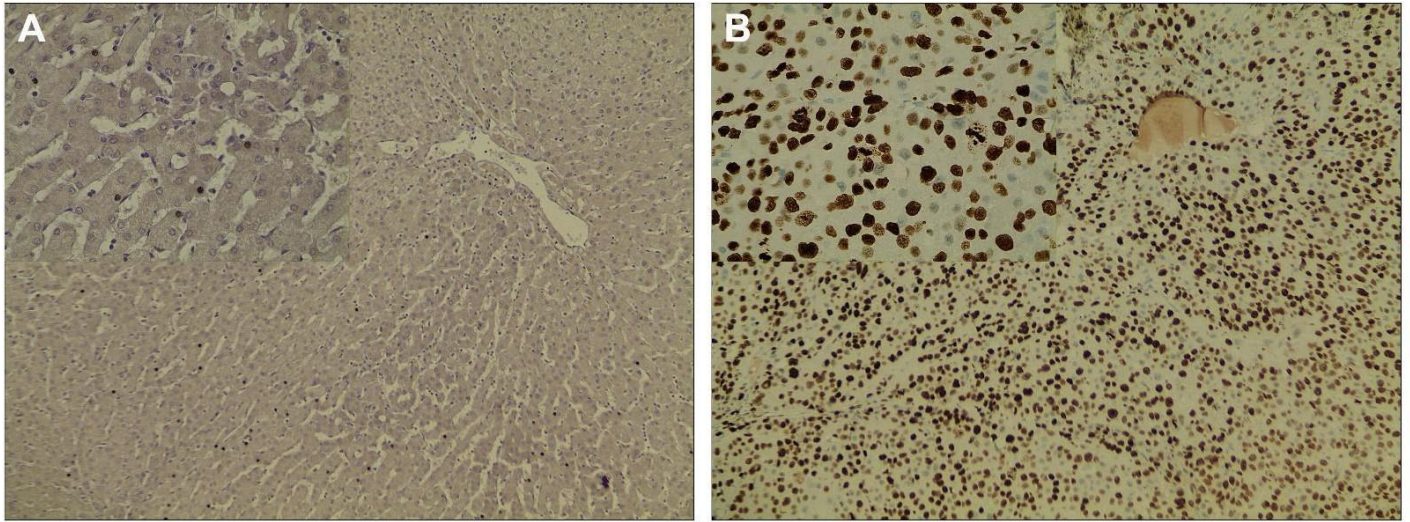

**Figure S3** ATAD2 protein in normal liver and HCC tissues from our institution. A, Normal liver tissues stain negative for ATAD2, immunohistochemistry,  $\times 200$  (larger)  $\times 400$  (smaller); B, HCC tissues stain positive for ATAD2, immunohistochemistry,  $\times 200$  (larger)  $\times 400$  (smaller).

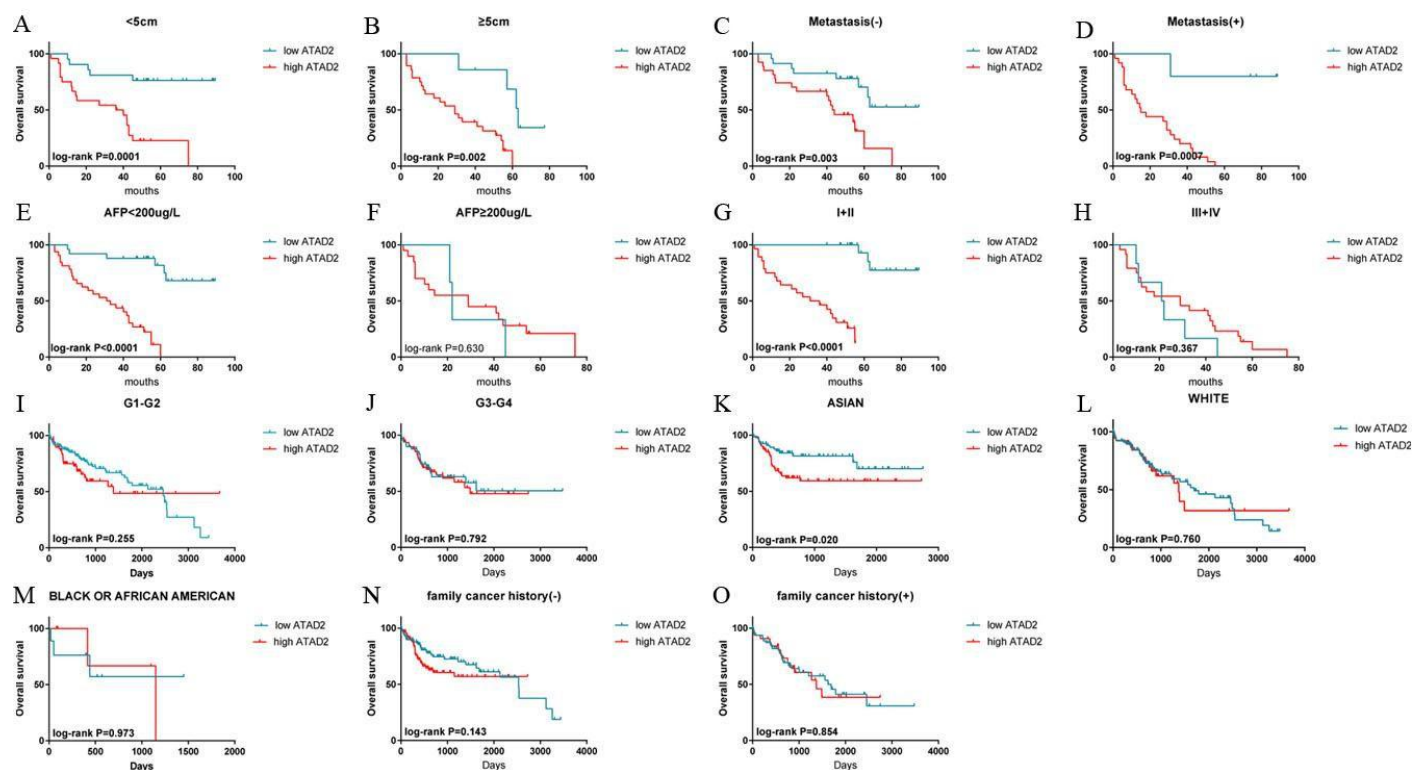

Figure S4 Kaplan-Meier survival curves from subgroup analysis of the relationships between ATAD2 expression and prognosis showing overall survival among TCGA (mRNA level) and CMUD (protein level) cases. A-H,CMUD; I-O,TCGA
