# Supplementary material for: Integrated Bioinformatics Analysis of the Clinical Value and Biological Function of ATAD2 in Hepatocellular Carcinoma
Source: Biomed Res Int. 2020 May 5;2020:8657468. doi: 10.1155/2020/8657468 (PMC7225861; doi:10.1155/2020/8657468)
Supplement: Supplementary Materials — Table S1: univariate and multivariate analyses of individual parameters for correlations with overall survival rate: Cox proportional hazards model. Table S2: comparison of diagnostic efficacy among ATAD2, GPC3 and AFP in the diagnosis of HCC in Asian race from TCGA data. Figure S1: flow chart of the researching content in the present study. Figure S2: ATAD2 expression pattern based on Gene Expression Profiling Interactive Analysis (GEPIA) and genetic alteration from cBioPortal. Figure S3: ATAD2 protein in normal liver and HCC tissues from our institution. Figure S4: Kaplan-Meier survival curves from subgroup analysis of the relationships between ATAD2 expression and prognosis showing overall survival among TCGA (mRNA level) and CMUD (protein level) cases. A-H, CMUD; I-O, TCGA. [file 8657468.f1.zip]

Archive with 5 entries (5 files):
- Figure S1_BMRI_3035126.doc
- Figure S2_BMRI_3035127.doc
- Figure S3_BMRI_3035128.doc
- Figure S4_BMRI_3035129.doc
- mat.8657468.v3.pdf
